# Supplementary material for: Significantly enhanced energy storage performance in BiFeO3/BaTiO3/BiFeO3 sandwich-structured films through crystallinity regulation
Source: Royal Society of Chemistry journal article supplement (doi:10.1039/c8cp04072a), 2018-01-01
Supplement: c8cp04072a1.pdf [file c8cp04072a1.pdf]

## Supporting Information

### Significantly enhanced energy storage performance in BiFeO<sub>3</sub>/BaTiO<sub>3</sub>/BiFeO<sub>3</sub> sandwich-structured films through crystallinity regulation

Yafei Hou,<sup>\*a, b</sup> Renlu Han,<sup>b</sup> Weiping Li,<sup>a</sup> Laihui Luo<sup>a</sup> and Weidong Fei<sup>\*b</sup>

<sup>a</sup> Department of Microelectronic Science and Engineering, Ningbo University, Ningbo 315211, P. R. China.

<sup>b</sup> State Key Lab of Advanced Welding and Joining, Harbin Institute of Technology, Harbin 150001, P. R. China.

\*corresponding authors: [houyafei@nbu.edu.cn](mailto:houyafei@nbu.edu.cn), [wdfei@hit.edu.cn](mailto:wdfei@hit.edu.cn)

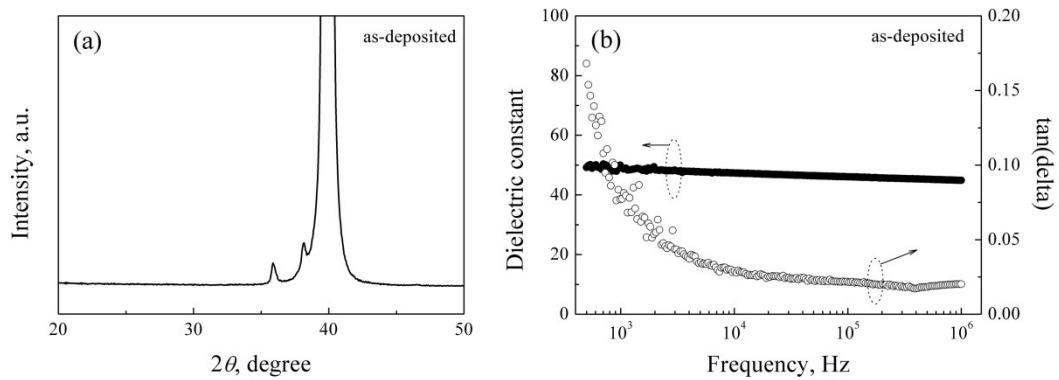

Fig. S1 (a) XRD pattern and (b) dielectric property of the as-deposited  $\text{BiFeO}_3/\text{BaTiO}_3/\text{BiFeO}_3$  film

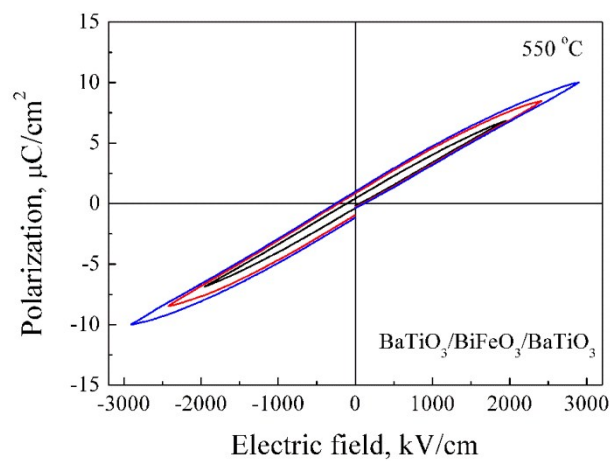

Fig. S2 Polarization behavior of BaTiO<sub>3</sub>/BiFeO<sub>3</sub>/BaTiO<sub>3</sub> film annealed at 550 °C with different electric field
